# Supplementary material for: Brewers’ spent grain (BSG)-based green dielectric materials for low-voltage operating solution-processed organic field-effect transistors
Source: Royal Society of Chemistry journal article supplement (doi:10.1039/d2tc02240k), 2022-01-01
Supplement: d2tc02240k1.pdf [file d2tc02240k1.pdf]

## Electronic Supplementary Information

### **Brewers' Spent Grain (BSG)-Based Green Dielectric Materials for Low-Voltage Operating Solution-Processed Organic Field-Effect Transistors**

*Seungjae Yun,<sup>1</sup> Youngseok Kim,<sup>1</sup> Seunghan Lee,<sup>1</sup> Dongil Ho,<sup>1</sup> Jaeseung Kim,<sup>2</sup> Hyunjung Kim,<sup>2</sup> Ombretta Marconi,<sup>3</sup> Assunta Marrocchi,<sup>4</sup> Choongik Kim.<sup>1,\*</sup>*

<sup>1</sup> Department of Chemical and Biomolecular Engineering, Sogang University, Seoul 04107, Republic of Korea

<sup>2</sup> Department of Physics, Sogang University, Seoul 04107, Republic of Korea

<sup>3</sup> Italian Brewing Research Centre (CERB) and Department of Agricultural, Food and Environmental Sciences, University of Perugia via S. Costanzo, n.c.n., 06126 Perugia, Italy.

<sup>4</sup> Department of Chemistry, Biology and Biotechnology, University of Perugia, Via Elce di Sotto, 8, 06123 Perugia, Italy.

E-mail: choongik@sogang.ac.kr

**Keywords:** Brewers' spent grain; dielectric; eco-friendly; green solvent; organic field-effect transistors

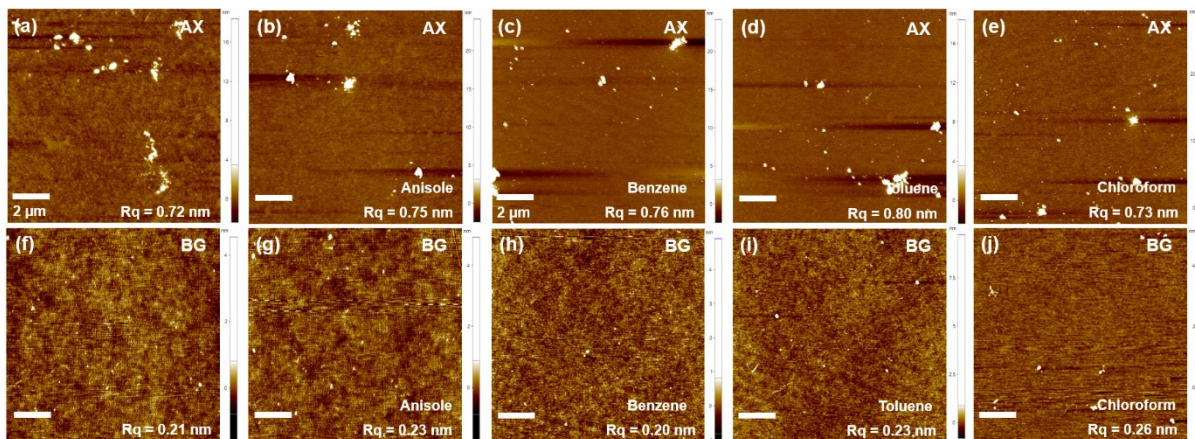

**Fig. S1.** AFM images (area size  $10 \mu\text{m} \times 10 \mu\text{m}$ ) of spin-coated (a)-(e) arabinosyloxylan (AX) and (f)-(j) beta-glucan (BG) films: (a), (f) before solvent treatment, and (b – e)/(g – j) AX and BG films after immersing in anisole, benzene, toluene, and chloroform, respectively, for 5 min followed by spinning at 2000 rpm and annealing at  $100 \text{ }^\circ\text{C}$  for 1 h.

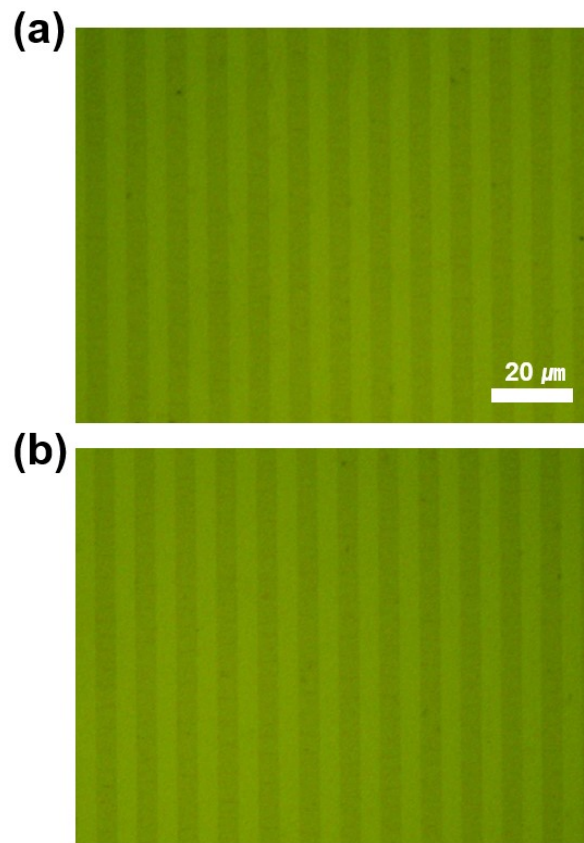

**Fig. S2.** OM images of the patterned (a) arabinoxylan and (b) beta-glucan films via reactive ion etcher.

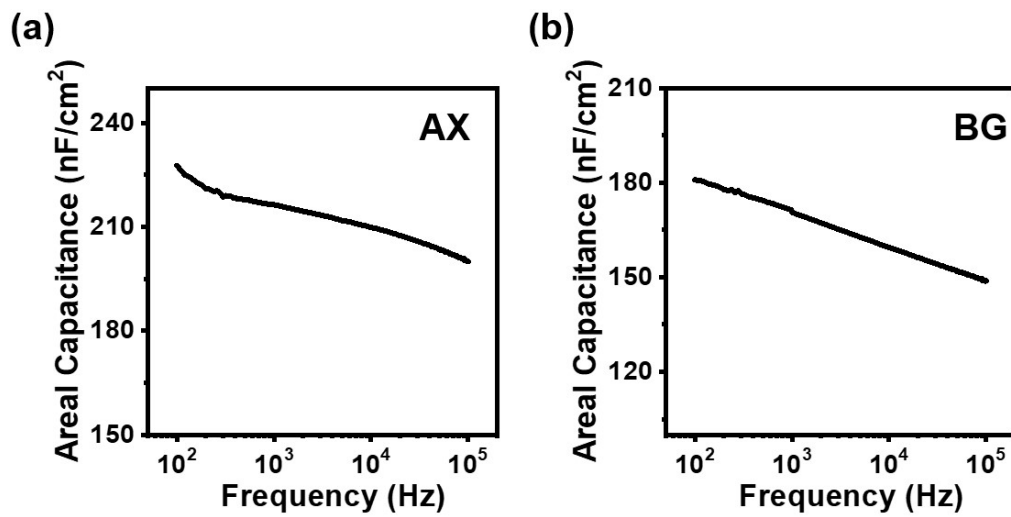

**Fig. S3.** Areal capacitance vs. frequency plots of (c) AX, and (d) BG dielectrics

**(a)**

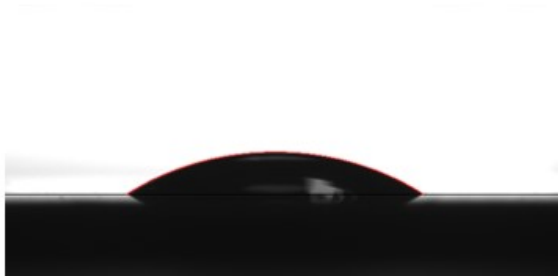

**(b)**

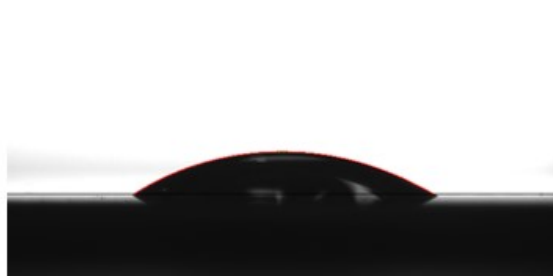

**Fig. S4.** Water contact angle images of the (a) AX and (b) BG films.

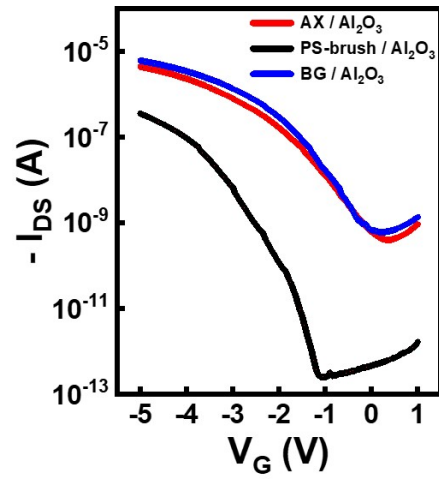

**Fig. S5.** Comparison of transfer characteristics of Ph-BTBT-C<sub>10</sub> OFETs based on indicated dielectrics; AX/alumina (red line), BG/alumina (blue line), and PS-brush/alumina (black line)
